# Supplementary material for: Delay models for the early embryonic cell cycle oscillator
Source: PubMed Central journal article supplement (PMC5868829; doi:10.1371/journal.pone.0194769), 2018-03-26

$\tau = 1$  min

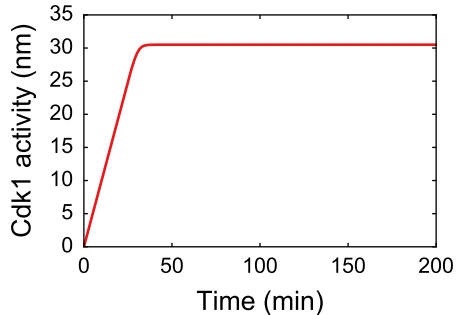

$\tau = 5$  min

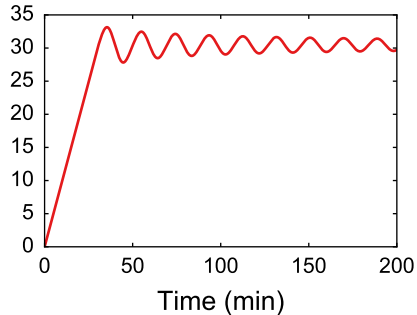

$\tau = 10$  min

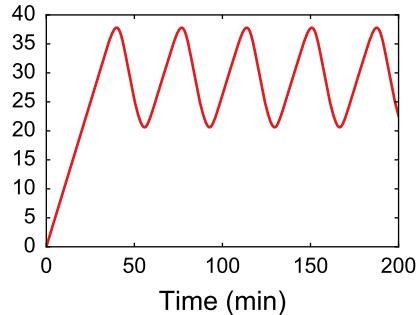

Supplement: pone.0194769.s001.pdf [file pone.0194769.s001.pdf]
