# Supplementary material for: Delay models for the early embryonic cell cycle oscillator
Source: PubMed Central journal article supplement (PMC5868829; doi:10.1371/journal.pone.0194769), 2018-03-26

$c = 0.2$

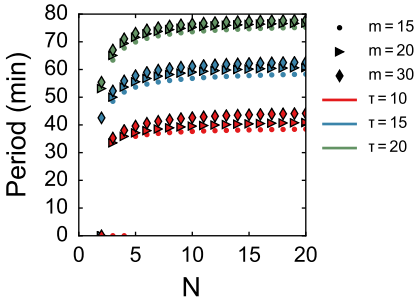

Supplement: pone.0194769.s005.pdf [file pone.0194769.s005.pdf]
