# Supplementary material for: Delay models for the early embryonic cell cycle oscillator
Source: PubMed Central journal article supplement (PMC5868829; doi:10.1371/journal.pone.0194769), 2018-03-26

$c = 0.7$

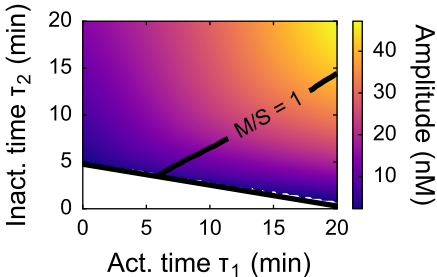

Supplement: pone.0194769.s008.pdf [file pone.0194769.s008.pdf]
