# Supplementary material for: Delay models for the early embryonic cell cycle oscillator
Source: PubMed Central journal article supplement (PMC5868829; doi:10.1371/journal.pone.0194769), 2018-03-26

$$\tau_1 + \tau_2 = 15 \text{ min}$$

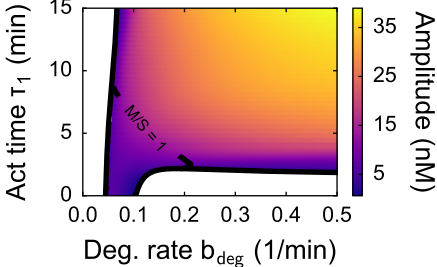

Supplement: pone.0194769.s009.pdf [file pone.0194769.s009.pdf]
